# Supplementary material
Source: PubMed Central journal article supplement (PMC7499026)
Supplement: AEM.01464-20-s0001.pdf [file AEM.01464-20-s0001.pdf]

## Supplemental Materials

**Title:**

**Extracellular vesicles produced by *Bifidobacterium longum* export mucin-binding proteins**

**Author:**

Keita Nishiyama, Takashi Takaki, Makoto Sugiyama, Itsuko Fukuda, Maho Aiso, Takao Mukai, Toshitaka Odamaki, Jin-zhong Xiao, Ro Osawa, Nobuhiko Okada

Table: S1–S2.

Figure: S1–S6.

**Table S1. Proteomic analysis of the EVs fraction from *B. longum* NCC2705**

| Band | Protein                                       | MW     | Note*          | Location** |
|------|-----------------------------------------------|--------|----------------|------------|
|      | FTR1 family protein                           | 64,804 | WP_011068493.1 | CM         |
|      | Glutamate-tRNA ligase                         | 56,681 | WP_007051591.1 | C          |
|      | Pyruvate kinase                               | 55,268 | WP_007055467.1 | C          |
| 1    | MHS family MFS transporter                    | 54,634 | WP_100986529.1 | CM         |
|      | Glutamyl-tRNA(Gln) amidotransferase subunit A | 54,170 | WP_007054751.1 | C          |
|      | DivIVA domain-containing protein              | 50,613 | WP_007054070.1 | U          |
|      | Sucrose transport protein                     | 49,455 | WP_011067958.1 | CM         |
|      | ATP-binding protein                           | 50,192 | WP_007051743.1 | C          |
|      | Dipeptidase                                   | 48,282 | WP_011068282.1 | C          |
|      | Serine-tRNA ligase                            | 47,956 | WP_007052327.1 | C          |
| 2    | Aminotransferase                              | 47,185 | WP_007056527.1 | C          |
|      | Elongation factor Tu                          | 43,936 | WP_007051202.1 | C          |
|      | Hypothetical protein                          | 40,416 | WP_007057587.1 | C          |
|      | Ketol-acid reductoisomerase                   | 38,552 | WP_007051651.1 | C          |
| 3    | Glyceraldehyde 3-phosphate dehydrogenase      | 37,716 | WP_007052589.1 | C          |
|      | putative sulfate exporter family transporter  | 37,476 | WP_007051199.1 | CM         |
|      | 30S ribosomal protein S3                      | 30,156 | WP_007053036.1 | C          |
| 4    | vitamin K epoxide reductase family protein    | 25,926 | WP_007054040.1 | CM         |
|      | ABC transporter ATP-binding protein           | 22,932 | WP_007051383.1 | C          |
| 5    | 50S ribosomal protein L25                     | 21,815 | WP_007052163.1 | C          |
|      | Adenine phosphoribosyltransferase             | 20,251 | WP_011068112.1 | C          |
|      | Hsp20-family heat shock chaperone             | 18,766 | WP_007055906.1 | C          |
| 6    | Inorganic pyrophosphatase                     | 18,310 | WP_007054759.1 | C          |
|      | 30S ribosomal protein S9                      | 17,607 | WP_003829868.1 | C          |

\*Note : Accession in Mascot Search Results

\*\*Location: Protein cellular location was annotated by PSORT II Prediction (<https://psort.hgc.jp/form2.html>).

C, cytoplasmic; CM, cytoplasmic membrane; U, unknown.

**Table S2. Oligonucleotides used in this study**

| Protein                 | Gene          | Locus tag | Fw 5'-3'                                | Rv 5'-3'                                 |
|-------------------------|---------------|-----------|-----------------------------------------|------------------------------------------|
| phosphoketolase         | <i>bI0959</i> | BL0959    | <u>CATATG</u> ACGAGTCCTGTTATTGGC        | <u>AAGCTT</u> CTCGTTGTCGCCAGCGGTAG       |
| chaperone GroEL         | <i>groEL</i>  | BL0002    | <u>CATATG</u> GCAAAGATCATCTTTATG        | <u>AAGCTT</u> GTAGCCCATGTCGGCACCG        |
| elongation factor Tu    | <i>tuf</i>    | BL1097    | <u>CATATG</u> GCAAAGGAAAAGTACGAGCG      | <u>AAGCTT</u> GCGGAGGATCTTGGTCACACGA     |
| phosphoglycerate kinase | <i>pgk</i>    | BL0707    | <u>CATATG</u> ACAAAACACCGCATTTCAGTCAGTA | <u>AAGCTT</u> CTCAAGCACCTTCAGGCCAGGGAGCT |
| transaldolase           | <i>tal</i>    | BL0715    | <u>CATATG</u> ACTGAAGCAACTCAGCGTAC      | <u>AAGCTT</u> CACGCGGTCGATGCCGGACT       |
| Hsp20                   | <i>bI0576</i> | BL0576    | <u>CATATG</u> GCAATGTTTCCGGCTTTG        | <u>AAGCTT</u> GCCCTCAATCGCGATTTGGTGC     |

Introduced *Nde*I and *Hind*III restriction site is underlined.

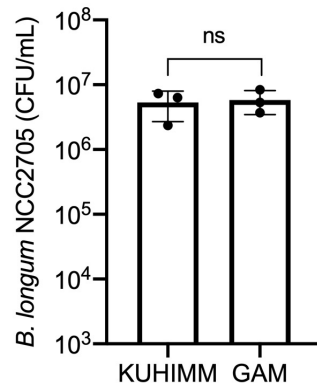

**Fig. S1**

**Viable cell count of *B. longum* NCC2705**

*B. longum* NCC2705 culture broth (after 15 h) was spread on the cell-free KUHIMM (faecal sample code M60) or GAM agar plate, and cultured at 37°C for 30 h under anaerobic conditions. Colonies were scraped and suspended into 1 mL of PBS adjusted to OD<sub>600</sub> = 0.1. Colony-forming unit (CFU) was determined by serial dilution and spread plating on GAM broth. The error bars indicate the s.d.; data are based on three biological replicates. Statistical significance was determined using two-tailed, unpaired *t*-tests. “ns”, no significant change in expression ( $P > 0.05$ ).

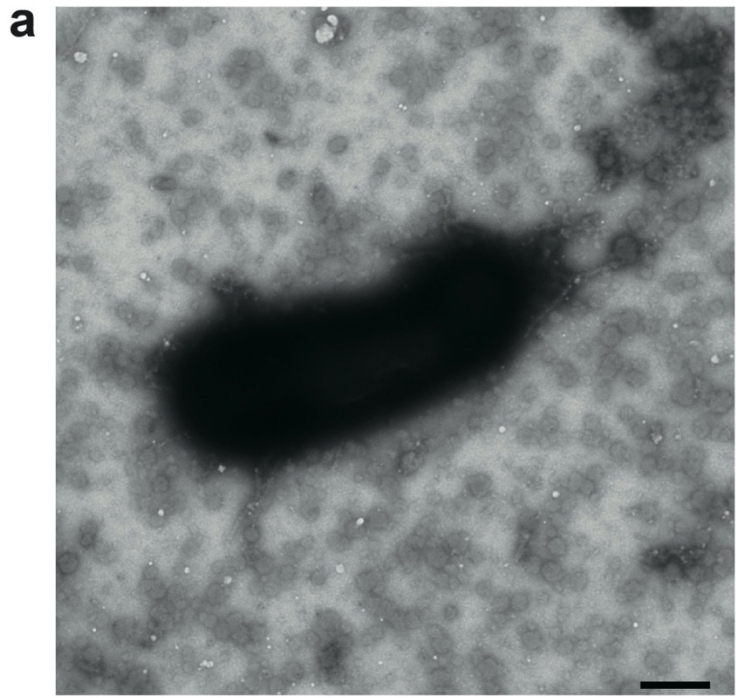

500 nm

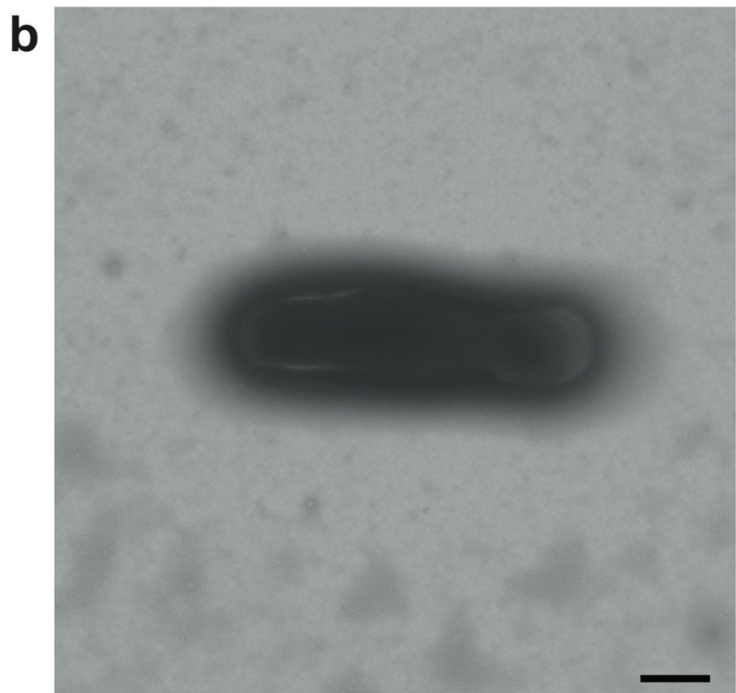

500 nm

**Fig. S2 Electron microscope image of *B. longum* NCC2705**

*B. longum* was cultured with different fecal fermentation HUKIMM broth, which supplemented with individual feces (a) sample code F40 and (b) sample code M27 <sup>(1)</sup>. The whole bacterial cells were negatively stained with uranyl acetate, and examined by transmission electron microscopy TEM H-7600.

**a**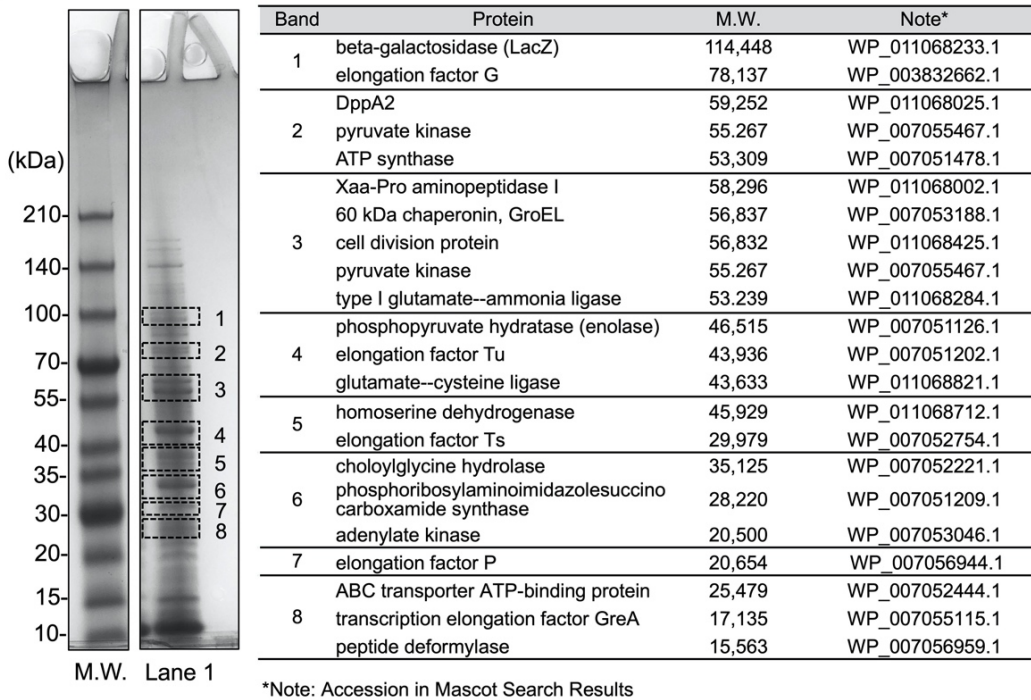**b**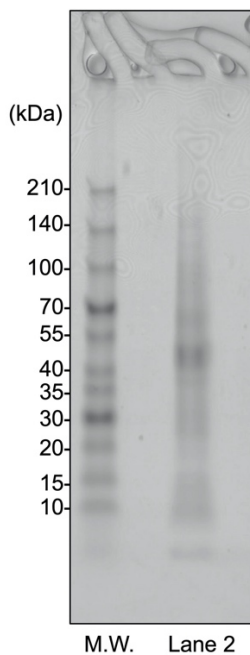**Fig. S3****Protein expression profile of *B. longum* NCC2705**

(a) The KUHIMM-cultured *B. longum* whole cell lysate (Lane 1, 10 µg protein/lane) or (b) KUHIMM-broth (Lane 2, 10 µg protein/lane) was separated by SDS-PAGE and proteins were visualized by Coomassie brilliant blue. (a) Eight bands fragments (whole cell lysate) were excised for protein identification by MALDI-ToF MS. Identified proteins and calculated molecular weights are indicated on the right. M.W.: molecular weight marker (Pre-stained XL-Ladder Broad, Integrale, Tokushima, Japan). Masses are indicated in “kDa” to the left of the each gels.

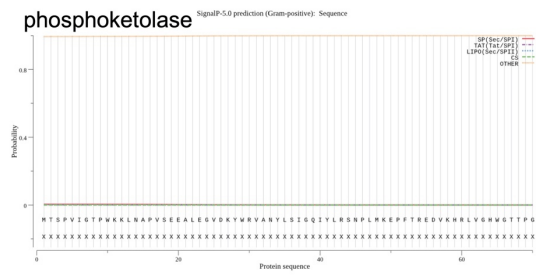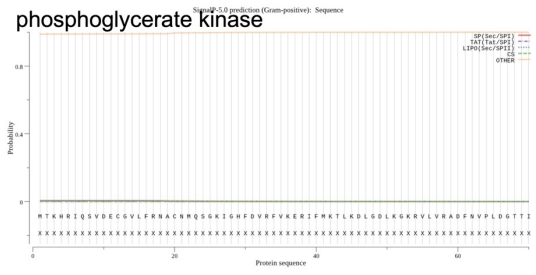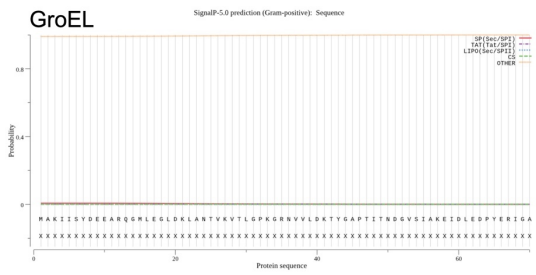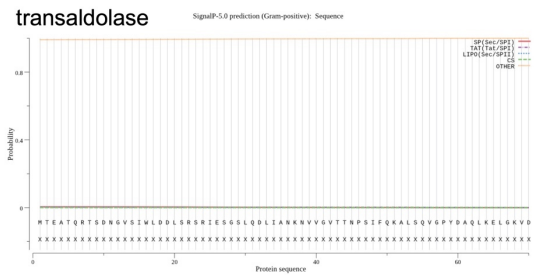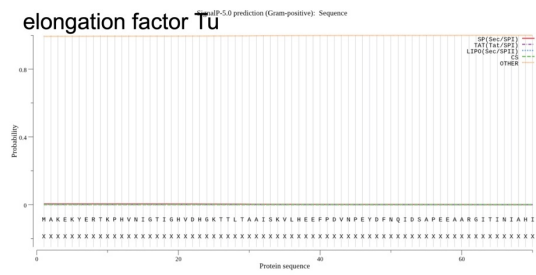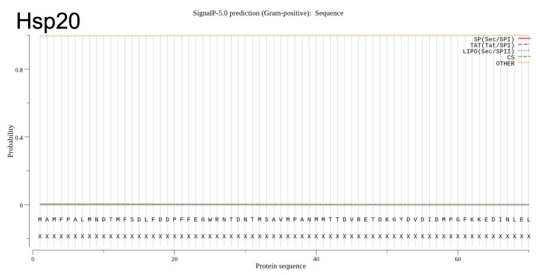

**Fig. S4**

**Prediction of the N-terminal secretory signal**

The presence or absence of secretory signal was analyzed by SignalP-5.0 (<http://www.cbs.dtu.dk/services/SignalP/>).

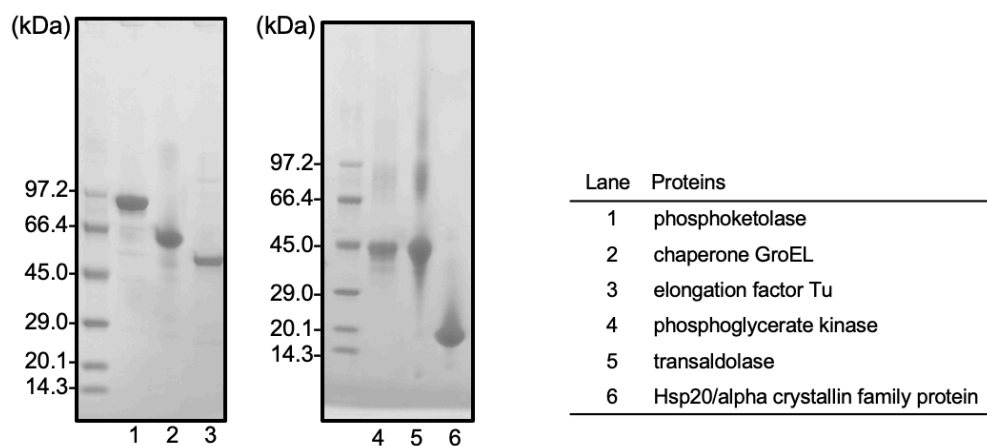

**Fig. S5**

**Expression and purification of recombinant proteins from *B. longum* NCC2705**

Recombinant His<sub>6</sub>-tagged proteins were expressed in *E. coli*. These proteins were verified by SDS-PAGE followed by staining with Coomassie Brilliant Blue.



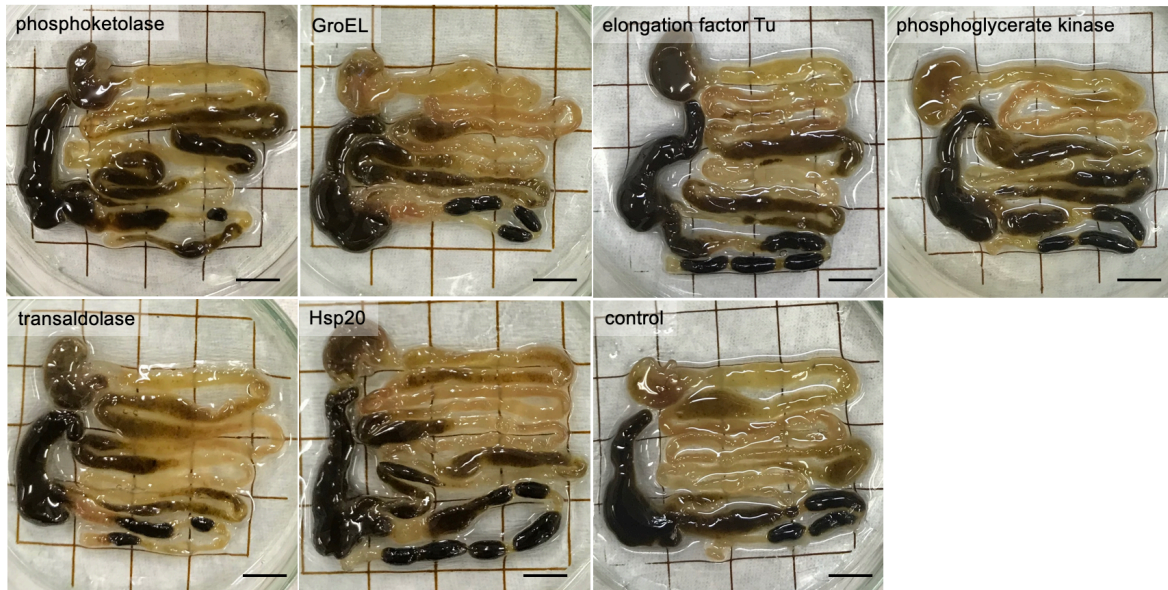

scale = 1 cm

**Fig. S6**

**Visualization of mouse whole gastrointestinal (GI) tract using the tissue clearing method**

Recombinant protein immobilized-microbeads were orally administered to mice. After 24 h after administration, whole GI tissues were treated with increasing concentrations of aqueous fructose solutions for tissue clearing. Scale bar, 1 cm.

## Reference

- (1) Sasaki D, Sasaki K, Ikuta N, Yasuda T, Fukuda I, Kondo A, Osawa R. 2018. Low amounts of dietary fibre increase in vitro production of short-chain fatty acids without changing human colonic microbiota structure. *Sci. Rep.* 8:435.
